# Supplementary material for: The effect of caffeine on cognitive performance is influenced by CYP1A2 but not ADORA2A genotype, yet neither genotype affects exercise performance in healthy adults
Source: PubMed Central journal article supplement (PMC7295849; doi:10.1007/s00421-020-04384-8), 2020-04-30

**The effect of caffeine on cognitive performance is influenced by CYP1A2 but not ADORA2A genotype, yet neither genotype affects exercise performance in healthy adults**

European Journal of Applied Physiology

Alexander T. Carswell<sup>1</sup>, Kevin Howland<sup>2</sup>, Borja Martinez-Gonzalez<sup>1</sup>, Pauline Baron<sup>1</sup> and Glen Davison<sup>1</sup>

<sup>1</sup>Endurance Research Group, School of Sport and Exercise Sciences, University of Kent, Chatham, Kent, United Kingdom

<sup>2</sup>School of Biosciences, University of Kent, Canterbury, Kent, United Kingdom

Corresponding author: Dr. Glen Davison

Email address: g.davison@kent.ac.uk

## Electronic supplementary material

**Supplementary Fig. 1** Serum (a, b, c) caffeine, (d, e, f) paraxanthine, and (g, h, i) the paraxanthine:caffeine ratio measured pre-supplementation, and 30-min and 120-min post-caffeine supplementation ( $3 \text{ mg}\cdot\text{kg}^{-1}$  body mass). Participants ( $n = 16$ ) are categorised according to ADORA2A genotype (a, d, g: 'high',  $n = 10$  or 'low' sensitivity,  $n = 6$ ); CYP1A2 genotype (b, e, h: 'fast',  $n = 8$  or 'slow' metaboliser,  $n = 8$ ); and ADORA2A and CYP1A2 genotypes (c, f, i: 'high' sensitivity, 'fast' metaboliser,  $n = 6$  or 'others',  $n = 10$ ). Data are mean  $\pm$  SD. Mixed model ANOVA genotype x time interaction  $P > 0.05$  for caffeine, paraxanthine and the paraxanthine:caffeine ratio

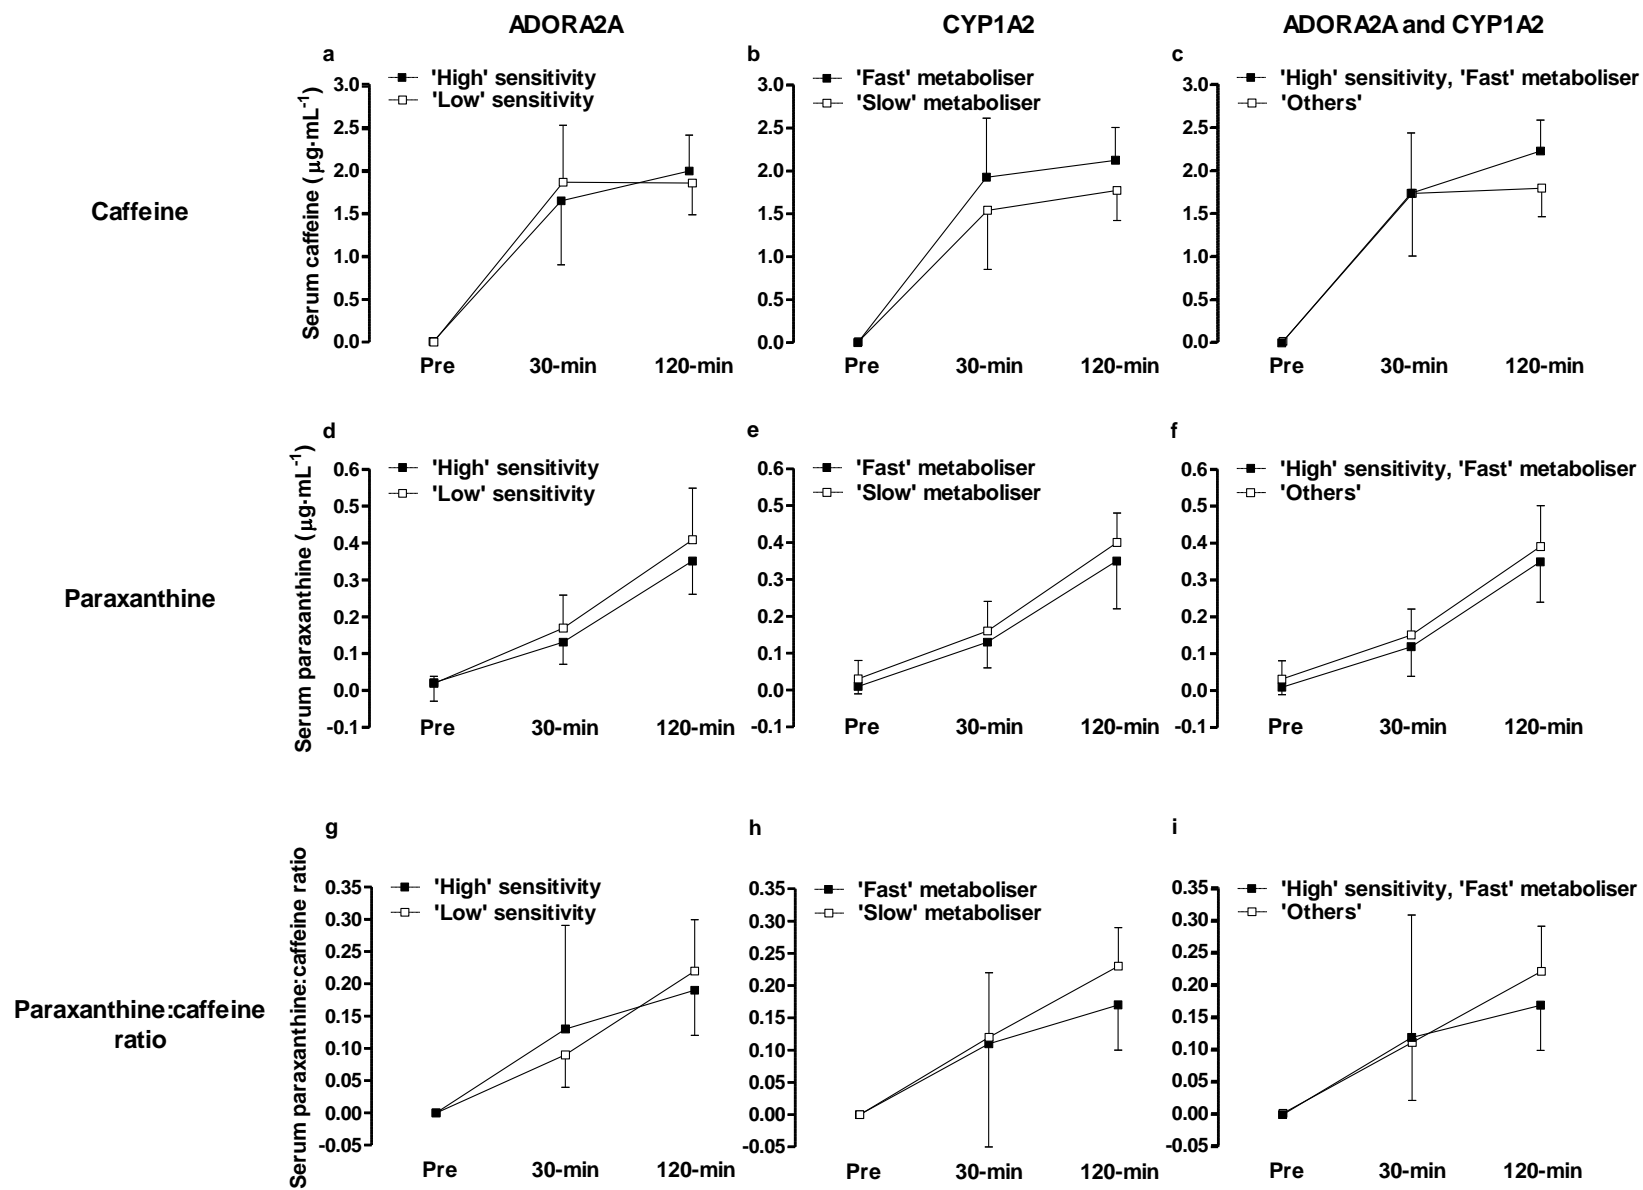

Supplement: 421_2020_4384_MOESM1_ESM.pdf [file 421_2020_4384_MOESM1_ESM.pdf]
